# Supplementary material
Source: MDPI journal article supplement (https://www.mdpi.com/2073-4344/11/6/741)
Supplement: s1 [file s1]

**Supporting Information for**

**Exploring the stability of Fe-Ni alloy  
nanoparticles exsolved from double-  
layered perovskites for dry reforming of  
methane**

**Alfonso J. Carrillo\*, Jose M. Serra\***

Instituto de Tecnología Química, Universitat Politècnica de València-CSIC,

Avda. Los Naranjos s/n, 46022 Valencia, Spain

\*Corresponding authors: [alcardel@itq.upv.es](mailto:alcardel@itq.upv.es); [jmserra@itq.upv.es](mailto:jmserra@itq.upv.es)

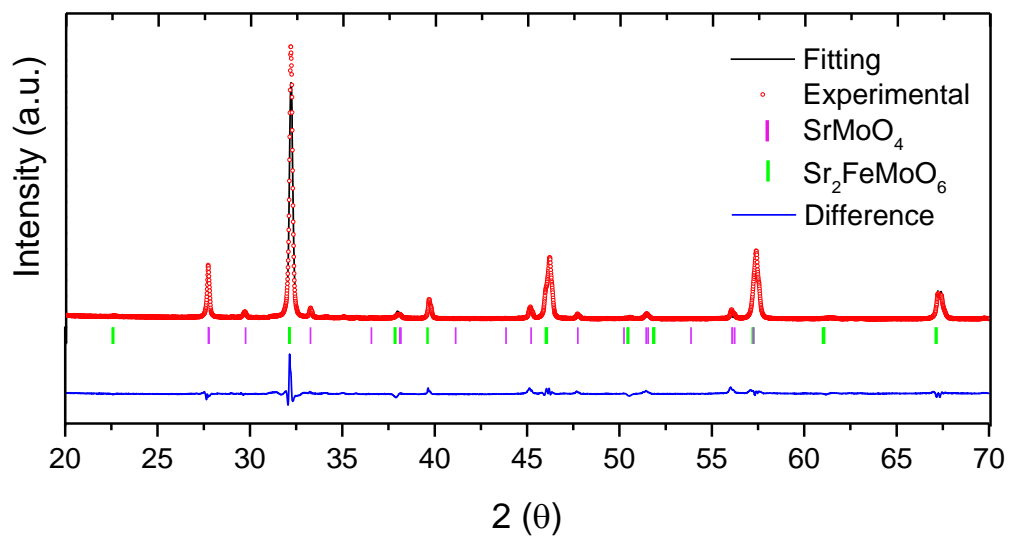

**Figure S1.** Rietveld refinement exemplified for  $\text{Sr}_2\text{Fe}_{0.5}\text{Ni}_{0.5}\text{MoO}_{6-\delta}$  material as synthesized (calcination at 1100 °C in air). Due to Ni doping on B-site there is a shift from the observed data to the reference taken for the double perovskite,  $\text{Sr}_2\text{FeMoO}_6$ .

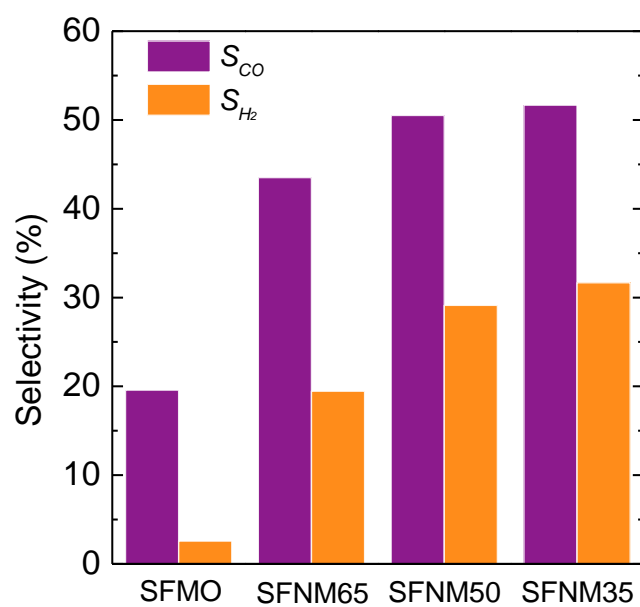

**Figure S2.** CO ( $S_{CO}$ ) and H<sub>2</sub> selectivity ( $S_{H_2}$ ) for the four materials, measured at 10h on stream. (T=850 °C)
